# Supplementary material
Source: PubMed Central journal article supplement (PMC3025466)
Supplement: emboj2010321s1.pdf [file emboj2010321s1.pdf]

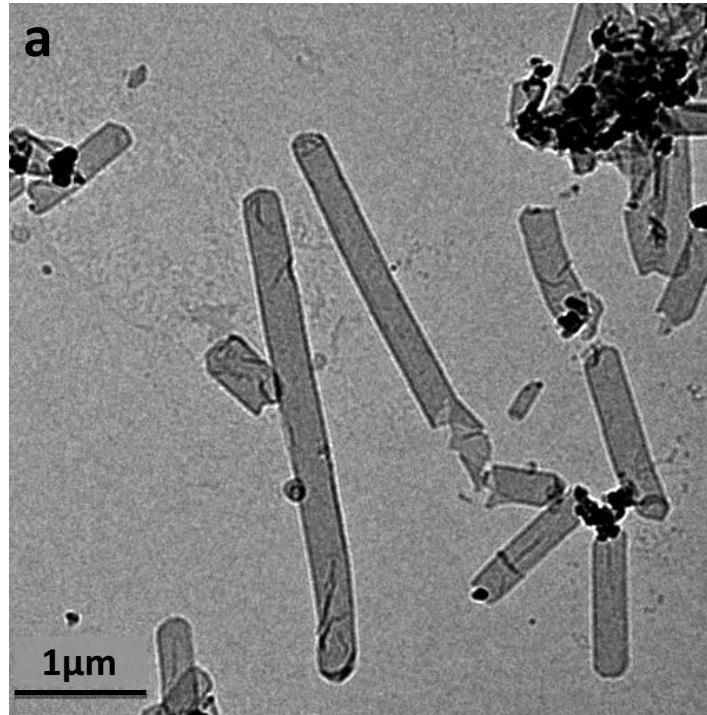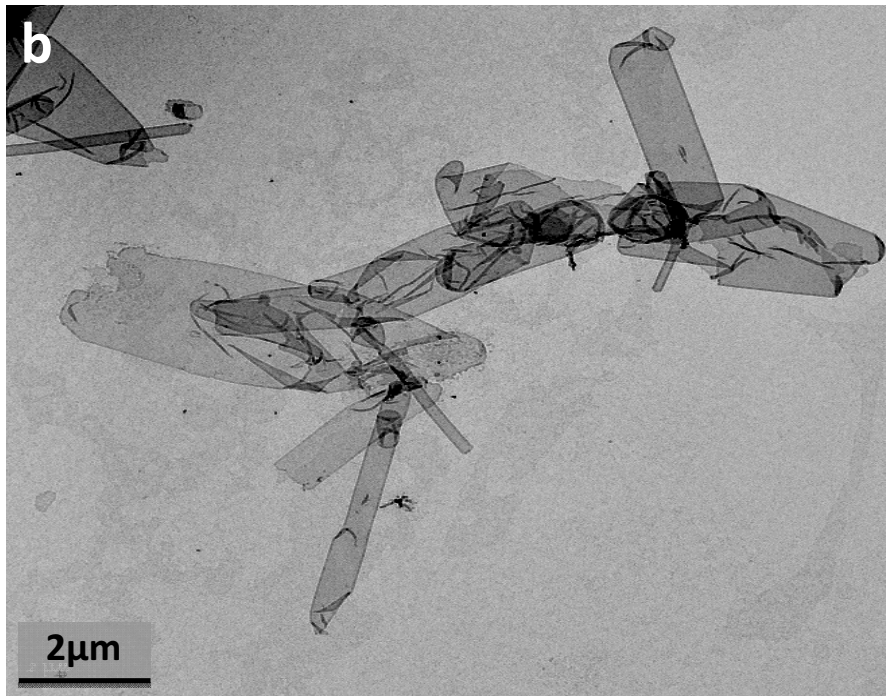

**Supplementary Figure 1:** Improved 2D crystals of NhaP1 (b) compared to previous 2D crystals (Vinothkumar et al., 2005)

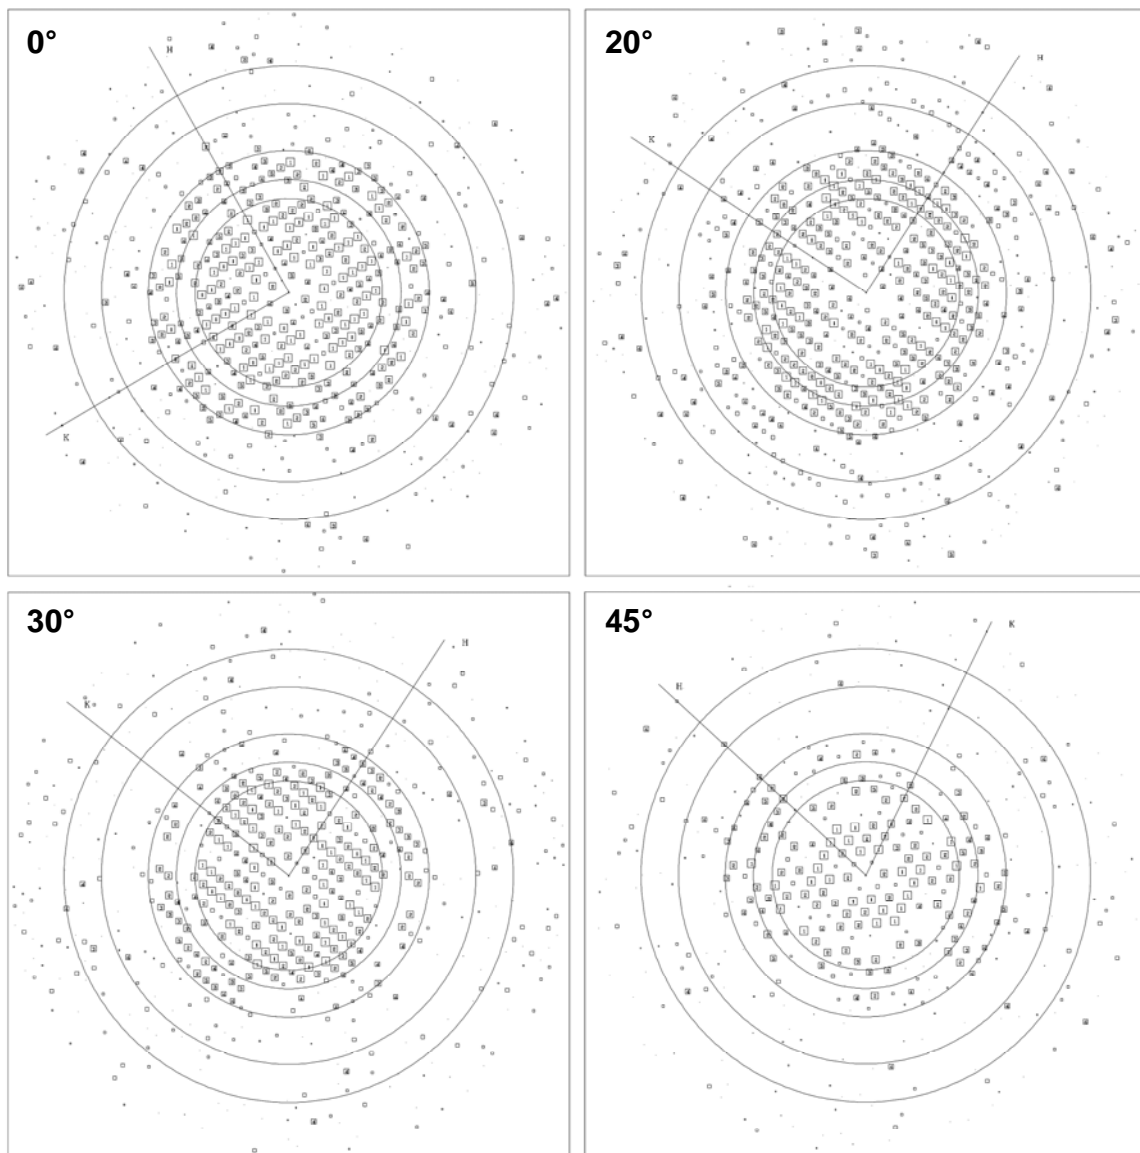

**Supplementary Figure 2:** Fourier transforms of typical images recorded at the indicated tilt angles. Circles denote 12, 10, 8, 6 and 4 Å resolutions respectively.

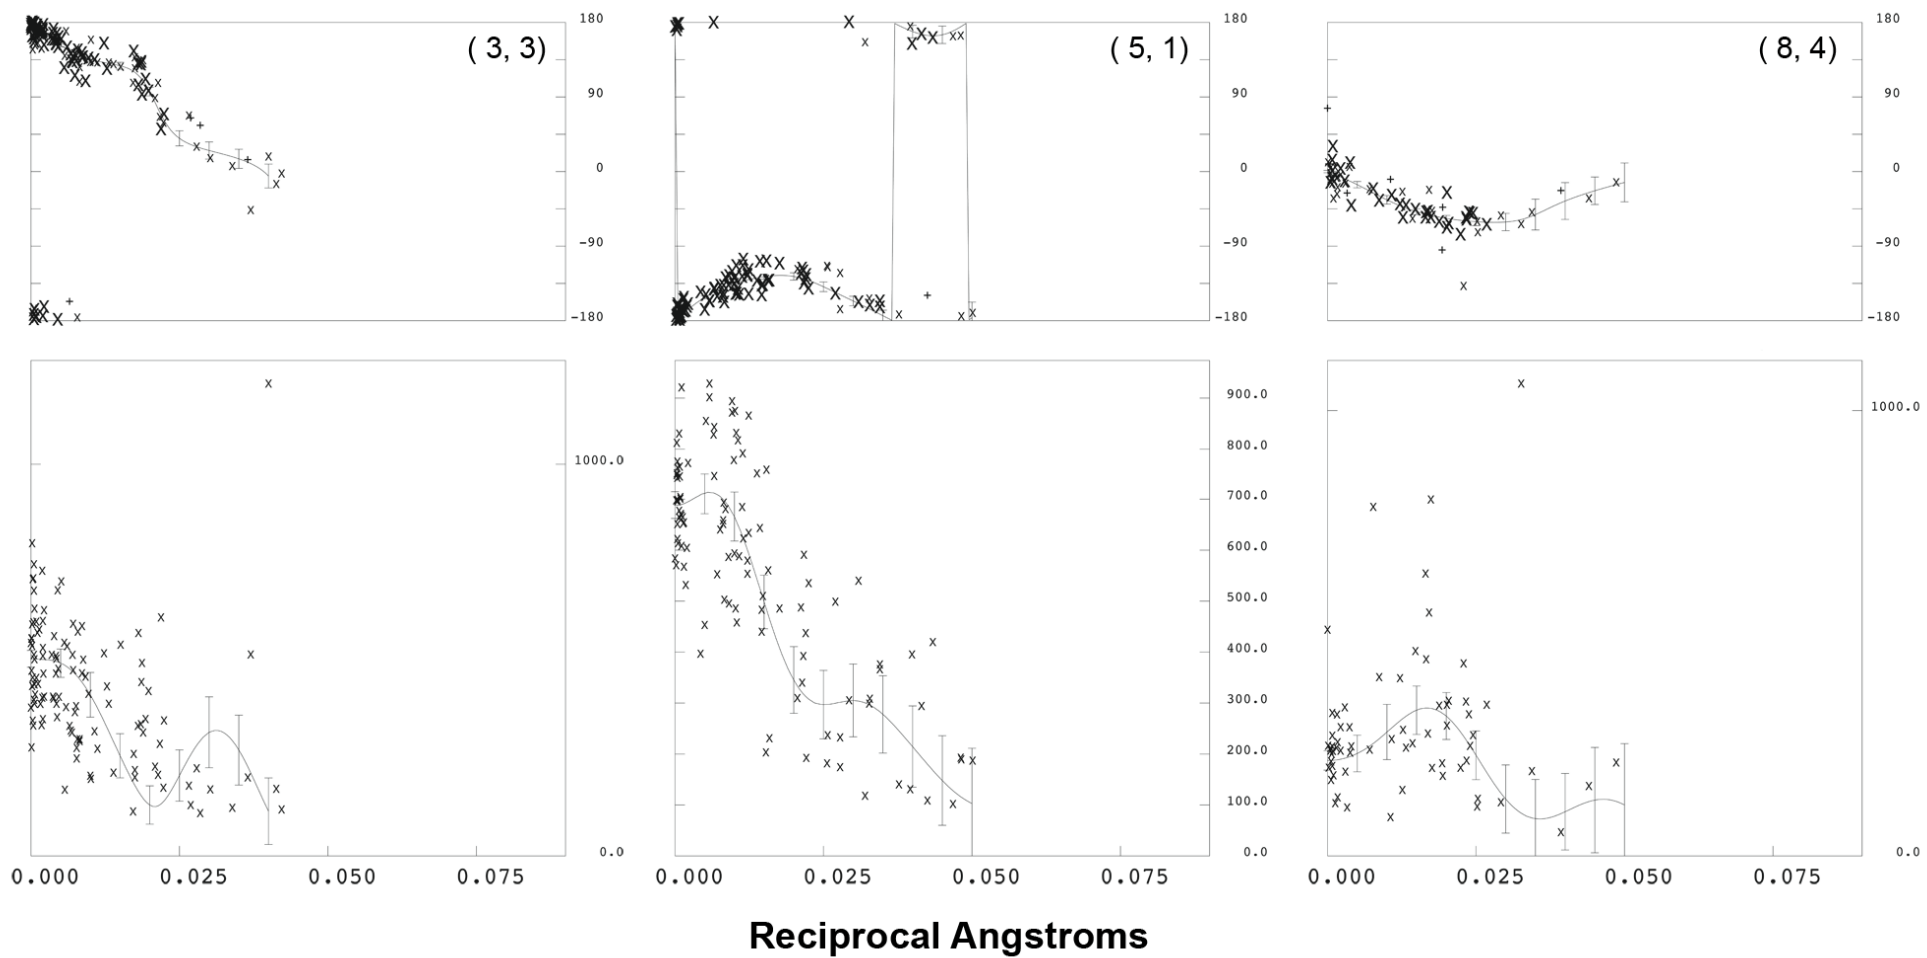

**Supplementary Figure 3:** Phases (top) and amplitudes of three representative lattice lines plotted against the reciprocal lattice coordinate  $z^*$ . Smooth curves were drawn by weighted least squares. Bars indicate fitting errors at sampling intervals.

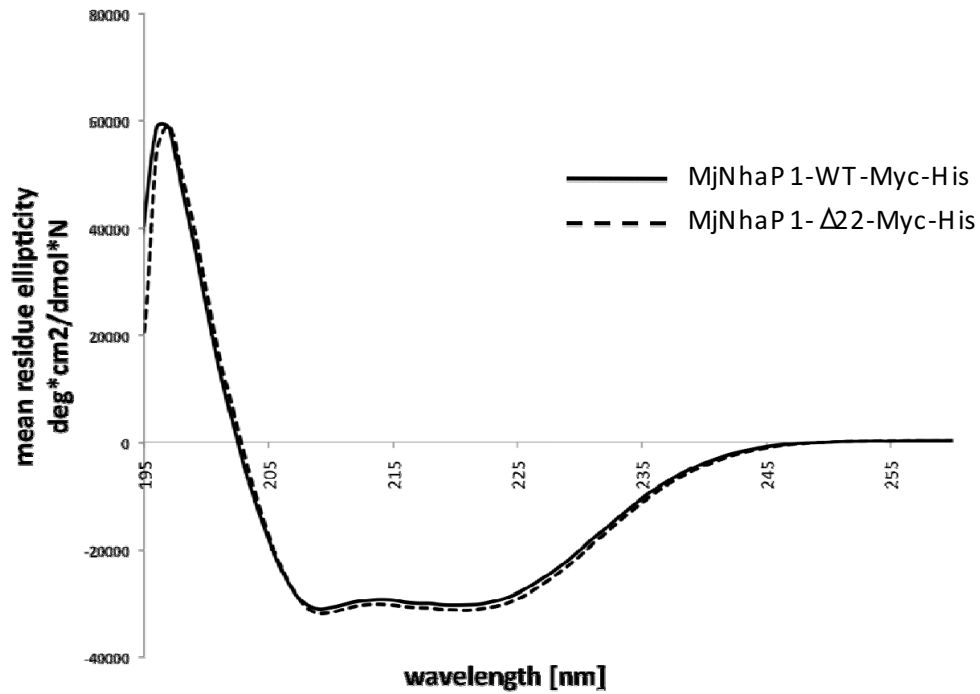

**Supplementary Figure 4:** CD spectroscopy of purified NhaP1 WT and  $\Delta 22$  deletion construct. CD spectra were recorded of  $\sim 4\mu\text{M}$  Ni-NTA-affinity purified NhaP1-WT-Myc-His or NhaP1- $\Delta 22$ -Myc-His in 0.03% DDM detergent solution in a JASCO spectrometer with a 1mm cuvette at 22°C. The spectra were normalized for protein concentration, molecular mass and the number of residues in each construct.
